# Supplementary material
Source: MDPI journal article supplement (https://www.mdpi.com/2075-163X/10/8/713)
Supplement: s1 [file s1]

## Sheet: Table S1
Table S1. List of samples studied in this research.
Sample	Stage	Ammonite Zone	Genus
CE-18-01	Lower Toarcian	Serpentinum	Passaloteuthis
CE-25-04	Lower Toarcian	Serpentinum	Passaloteuthis
CE-25-01	Lower Toarcian	Serpentinum	Passaloteuthis
PC-04-28	Middle Oxfordian	Transversarium	Hibolithes
PC-11-183	Middle Oxfordian	Transversarium	Hibolithes
PC-11-31	Middle Oxfordian	Transversarium	Hibolithes
PC-18-48	Upper Oxfordian	Bifurcatus	Hibolithes
PC-22-41	Upper Oxfordian	Bifurcatus	Hibolithes
PC-31-04	Upper Oxfordian	Bifurcatus	Hibolithes
PC-37-01	Upper Oxfordian	Bifurcatus	Hibolithes
PC-39-25	Upper Oxfordian	Bimammatum	Hibolithes
PC-40,41-43	Upper Oxfordian	Bimammatum	Hibolithes
PC-45-14	Upper Oxfordian	Bimammatum	Hibolithes
PC-45-86	Upper Oxfordian	Bimammatum	Hibolithes
PC-47-19	Lower Kimmeridgian	Planula	Belemnopsis
PC-52-58	Lower Kimmeridgian	Planula	Belemnopsis
PC-53-53	Lower Kimmeridgian	Platynota	Hibolithes
PC-57-50	Lower Kimmeridgian	Platynota	Belemnopsis
Sample	Specie	Origin
SP-01	Sepia officinalis	Alboran Sea
SP-02	Sepia officinalis	Alboran Sea
SP-03	Sepia officinalis	Alboran Sea
SP-04	Sepia officinalis	Alboran Sea
SP-05	Sepia officinalis	Alboran Sea
SP-06	Sepia officinalis	Alboran Sea
SP-07	Sepia officinalis	Alboran Sea
SP-08	Sepia officinalis	Cantabrian Sea
SP-09	Sepia officinalis	Cantabrian Sea
SP-10	Sepia orbignyana	Alboran Sea
SP-11	Sepia orbignyana	Alboran Sea
SP-12	Sepia orbignyana	Alboran Sea
SP-13	Sepia orbignyana	Alboran Sea
SP-14	Sepia orbignyana	Alboran Sea
SP-15	Sepia orbignyana	Alboran Sea
